# Supplementary material for: Brain metastasis and survival outcomes after first-line therapy in metastatic melanoma: a multicenter DeCOG study on 1704 patients from the prospective skin cancer registry ADOREG
Source: HighWire-hosted journal article supplement (doi:10.1136/jitc-2022-005828), 2023-04-01
Supplement: jitc-2022-005828supp001_data_supplement.pdf [file jitc-2022-005828supp001_data_supplement.pdf]

## Supplementary material

**Table S1a: Baseline characteristics and therapy outcome of first-line therapy (BRAF wildtype patients; n=916).**

|                                               | <b>BRAF wildtype<br/>CTLA-4+PD-1<br/>N=281 (100%)</b> | <b>BRAF wildtype<br/>PD-1<br/>N=544 (100%)</b> | <b>BRAF wildtype<br/>CTLA-4<br/>N=91 (100%)</b> |
|-----------------------------------------------|-------------------------------------------------------|------------------------------------------------|-------------------------------------------------|
| <b>Age</b>                                    |                                                       |                                                |                                                 |
| ≤65 years                                     | 158 (56.2)                                            | 145 (26.7)                                     | 41 (45.1)                                       |
| >65 years                                     | 123 (43.3)                                            | 399 (73.3)                                     | 50 (54.9)                                       |
| <b>Gender</b>                                 |                                                       |                                                |                                                 |
| Male                                          | 188 (66.9)                                            | 329 (60.5)                                     | 60 (65.9)                                       |
| Female                                        | 93 (33.1)                                             | 215 (39.5)                                     | 31 (34.1)                                       |
| <b>Previous adjuvant therapy in stage III</b> |                                                       |                                                |                                                 |
| None                                          | 268 (95.4)                                            | 531 (97.6)                                     | 86 (94.5)                                       |
| Immune checkpoint inhibitors                  | 11 (3.9)                                              | 6 (1.1)                                        | 2 (2.2)                                         |
| Interferon-alpha                              | 2 (0.7)                                               | 7 (1.3)                                        | 3 (3.3)                                         |
| blinded                                       | 0 (0.0)                                               | 0 (0.0)                                        | 0 (0.0)                                         |
| <b>Previous adjuvant therapy in stage IV</b>  |                                                       |                                                |                                                 |
| None                                          | 255 (90.7)                                            | 511 (93.9)                                     | 81 (89.0)                                       |
| Immune checkpoint inhibitors                  | 24 (8.5)                                              | 19 (3.5)                                       | 3 (3.3)                                         |
| Interferon-alpha                              | 1 (0.4)                                               | 12 (2.2)                                       | 3 (3.3)                                         |
| Blinded                                       | 1 (0.4)                                               | 2 (0.4)                                        | 0 (0.0)                                         |
| Chemotherapy                                  | 0 (0.0)                                               | 0 (0.0)                                        | 4 (4.4)                                         |
| <b>ECOG performance status</b>                |                                                       |                                                |                                                 |
| 0                                             | 156 (55.5)                                            | 261 (48.0)                                     | 29 (31.9)                                       |
| 1                                             | 24 (8.5)                                              | 95 (17.5)                                      | 5 (5.5)                                         |
| ≥2                                            | 7 (2.5)                                               | 22 (4.0)                                       | 2 (2.2)                                         |
| unknown                                       | 94 (33.5)                                             | 166 (30.5)                                     | 55 (60.4)                                       |
| <b>Serum LDH</b>                              |                                                       |                                                |                                                 |
| Normal (≤ULN)                                 | 132 (47.0)                                            | 281 (51.7)                                     | 46 (50.5)                                       |
| Elevated (>ULN)                               | 149 (53.0)                                            | 262 (48.2)                                     | 44 (48.4)                                       |
| >2xULN                                        | 87 (31.0)                                             | 119 (21.9)                                     | 26 (28.9)                                       |
| unknown                                       |                                                       | 1 (0.2)                                        | 1 (1.1)                                         |
| <b>Stage (AJCCv8)</b>                         |                                                       |                                                |                                                 |
| IIIC/D                                        | 28 (10.0)                                             | 113 (20.8)                                     | 8 (8.8)                                         |
| IV M1a                                        | 27 (9.6)                                              | 42 (7.7)                                       | 15 (16.5)                                       |
| IV M1b                                        | 59 (21.0)                                             | 156 (28.7)                                     | 24 (26.4)                                       |
| IV M1c                                        | 159 (56.6)                                            | 228 (41.9)                                     | 43 (47.3)                                       |
| Stage IV M1a-c, not specified                 | 8 (2.8)                                               | 5 (0.9)                                        | 1 (1.1)                                         |
| <b>Best overall response</b>                  |                                                       |                                                |                                                 |
| CR                                            | 31 (11.0)                                             | 73 (13.4)                                      | 2 (2.2)                                         |
| PR                                            | 59 (21.0)                                             | 75 (13.8)                                      | 10 (11.0)                                       |
| SD                                            | 26 (9.3)                                              | 82 (15.1)                                      | 7 (7.7)                                         |
| PD                                            | 83 (29.5)                                             | 210 (38.6)                                     | 61 (67.0)                                       |
| Mixed response                                | 14 (5.0)                                              | 21 (3.9)                                       | 0 (0.0)                                         |
| Unknown                                       | 68 (24.0)                                             | 83 (15.3)                                      | 11 (12.1)                                       |
| <b>Therapy end reason</b>                     |                                                       |                                                |                                                 |
| Planned stop                                  | 28 (10.0)                                             | 55 (10.1)                                      | 27 (29.7)                                       |
| Toxicity                                      | 90 (32.0)                                             | 67 (12.3)                                      | 21 (23.1)                                       |
| Disease progression                           | 77 (27.4)                                             | 240 (44.1)                                     | 40 (44.0)                                       |
| Patient wish                                  | 7 (2.5)                                               | 36 (6.6)                                       | 0 (0.0)                                         |
| Other                                         | 26 (9.3)                                              | 62 (11.4)                                      | 0 (0.0)                                         |
| Ongoing                                       | 47 (16.7)                                             | 73 (13.4)                                      | 0 (0.0)                                         |
| Lost to follow-up                             | 6 (2.1)                                               | 11 (2.0)                                       | 0 (0.0)                                         |

|                                        |                  |                     |                     |
|----------------------------------------|------------------|---------------------|---------------------|
| <b>Progression</b>                     |                  |                     |                     |
| No                                     | 149 (53.0)       | 216 (39.7)          | 22 (24.2)           |
| Yes                                    | 132 (47.0)       | 328 (60.3)          | 69 (75.8)           |
| <b>Death</b>                           |                  |                     |                     |
| No                                     | 195 (69.4)       | 307 (56.4)          | 53 (58.2)           |
| Yes                                    | 86 (30.6)        | 237 (43.6)          | 38 (41.8)           |
| <b>Development of brain metastases</b> |                  |                     |                     |
| No                                     | 236 (84.0)       | 441 (81.1)          | 68 (74.7)           |
| Yes                                    | 45 (16.0)        | 103 (18.9)          | 23 (25.3)           |
| <b>Progression-free survival</b>       |                  |                     |                     |
| Median in months (95% CI)              | 6.93 (4.14-9.73) | 6.44 (4.930-7.95)   | 2.10 (2.014-2.191)  |
| <b>Overall survival</b>                |                  |                     |                     |
| Median in months (95% CI)              | Not reached      | 34.56 (28.00-41.12) | 37.39 (21.99-52.79) |

Table S1b: Frequency of brain metastasis in BRAF wildtype patients.

|                                      | <b>BRAF wildtype<br/>All<br/>n=916 (100%)</b> | <b>BRAF wildtype<br/>CTLA-4+PD-1<br/>N=281<br/>(N=100%)</b> | <b>BRAF wildtype<br/>PD-1<br/>N=544<br/>(N=100%)</b> | <b>BRAF wildtype<br/>CTLA-4<br/>N=91 (N=100%)</b> |
|--------------------------------------|-----------------------------------------------|-------------------------------------------------------------|------------------------------------------------------|---------------------------------------------------|
| <b>Frequency of brain metastasis</b> |                                               |                                                             |                                                      |                                                   |
| During complete FU time              | 171 (18.7)                                    | 45 (16.0)                                                   | 103 (18.9)                                           | 23 (25.3)                                         |
| Within 12 months after therapy start | 113 (12.3)                                    | 31 (11.0)                                                   | 64 (11.8)                                            | 18 (19.8)                                         |
| Within 24 months after therapy start | 149 (16.3)                                    | 40 (14.2)                                                   | 87 (16.0)                                            | 22 (24.2)                                         |
| Within 36 months after therapy start | 161 (17.6)                                    | 43 (15.3)                                                   | 95 (17.5)                                            | 23 (25.3)                                         |

Table S2: Univariate Cox regression analysis for progression-free and overall survival in BRAF-wildtype patients.

| <b>Parameters included</b><br>(patient number)                                                                                            | <b>Progression-free survival</b><br><b>Hazard ratio (95% CI) P-value</b> | <b>Overall survival</b><br><b>Hazard ratio (95% CI) P-value</b>              |
|-------------------------------------------------------------------------------------------------------------------------------------------|--------------------------------------------------------------------------|------------------------------------------------------------------------------|
| <b>Gender (reference: male)</b><br>male versus female (577 vs.339)                                                                        | 1.092 (0.916-1.300) 0.326                                                | 1.208 (0.982-1.486) 0.074                                                    |
| <b>Age (reference: ≤65 years)</b><br>≤65 versus >65 years (344 vs. 572)                                                                   | 0.880 (0.738-1.049) 0.154                                                | 1.052 (0.852-1.298) 0.637                                                    |
| <b>BRAF status (reference: mutant)</b><br>BRAF V600 mutant versus wildtype                                                                | n.a.                                                                     | n.a.                                                                         |
| <b>ECOG performance status (reference: 0)</b><br>0 versus 1 (446 vs. 124)<br>0 versus ≥2 (446 vs. 31)                                     | 1.131 (0.871-1.468) 0.356<br>1.452 (0.900-2.343) 0.127                   | <b>1.772 (1.331-2.359) &lt;0.001</b><br><b>2.673 (1.619-4.414) &lt;0.001</b> |
| <b>Serum LDH (reference: normal)</b><br>normal versus elevated (459 vs. 455)                                                              | 1.173 (0.989-1.392) 0.067                                                | <b>1.495 (1.220-1.833) &lt;0.001</b>                                         |
| <b>Primary adjuvant drug therapy with immune checkpoint blockade or BRAF+MEK inhibitors (reference: no)</b><br>no versus yes (847 vs. 69) | 1.072 (0.770-1.491) 0.681                                                | 0.882 (0.562-1.385) 0.586                                                    |
| <b>Tumor stage (reference: M1c)</b><br>M1c versus Stage III C/D (430 vs. 149)<br>M1c versus Stage IV M1a (430 vs. 84)                     | 0.815 (0.638-1.042) 0.103<br>0.773 (0.558-1.071) 0.121                   | 0.757 (0.560-1.023) 0.070<br>0.759 (0.520-1.108) 0.154                       |

|                                                               |                                      |                                  |
|---------------------------------------------------------------|--------------------------------------|----------------------------------|
| M1c versus Stage IV M1b (430 vs. 239)                         | <b>0.700 (0.569-0.862) 0.001</b>     | <b>0.669 (0.522-0.858) 0.002</b> |
| <b>Type of first systemic therapy (reference:CTLA-4+PD-1)</b> |                                      |                                  |
| CTLA-4+PD-1 versus PD-1 (281 vs. 544)                         | 1.049 (0.857-1.284) 0.641            | <b>1.287 (1.005-1.647) 0.045</b> |
| CTLA-4+PD-1 versus CTLA-4 (281 vs. 91)                        | <b>2.880 (2.141-3.875) &lt;0.001</b> | 1.173 (0.828-1.664) 0.369        |
| <b>(reference:CTLA-4)</b>                                     |                                      |                                  |
| CTLA-4 versus PD-1 (91 vs. 544)                               | 0.364 (0.279-0.475) <0.001           | 1.097 (0.809-1.486) 0.551        |
| n.a., not applicable                                          |                                      |                                  |

**Table S3: Univariate Cox regression analysis for brain metastasis-free survival in BRAF-wildtype patients.**

| Parameters included (patient number)                                                                                                                           | Brain metastasis-free survival Hazard ratio (95% CI) P-value                                      |
|----------------------------------------------------------------------------------------------------------------------------------------------------------------|---------------------------------------------------------------------------------------------------|
| <b>Gender (reference: male)</b><br>male versus female (577 vs. 339)                                                                                            | 0.933 (0.681-1.280) 0.669                                                                         |
| <b>Age (reference: ≤65 years)</b><br>≤65 versus >65 years (344 vs. 572)                                                                                        | 0.852 (0.628-1.155) 0.302                                                                         |
| <b>BRAF status (reference: wildtype)</b><br>wildtype versus BRAF V600 mutant                                                                                   | n.a.                                                                                              |
| <b>ECOG performance status (reference :0)</b><br>0 versus 1 (446 vs. 124)<br>0 versus ≥2 (446 vs. 31)                                                          | 1.390 (0.899-2.150) 0.138<br>1.179 (0.432-3.129) 0.748                                            |
| <b>Serum LDH (reference: normal)</b><br>normal versus elevated (470 vs. 465)                                                                                   | 1.159 (0.857-1.567) 0.337                                                                         |
| <b>Pre-treatment with adjuvant immune checkpoint blockade or BRAF+MEK inhibitors (reference: no)</b><br>No versus yes (847 vs. 69)                             | 0.681 (0.335-1.385) 0.289                                                                         |
| <b>Tumor stage (reference: M1c)</b><br>M1c versus Stage III C/D (430 vs. 149)<br>M1c versus Stage IV M1a (430 vs. 84)<br>M1c versus Stage IV M1b (430 vs. 239) | <b>0.507 (0.310-0.830) 0.007</b><br><b>0.288 (0.126-0.657) 0.003</b><br>0.797 (0.567-1.120) 0.192 |
| <b>Type of first systemic therapy (reference:CTLA-4+PD-1)</b><br>CTLA-4+PD1 versus PD-1 (281 vs. 544)<br>CTLA-4+PD-1 versus CTLA-4 (281 vs. 91)                | 1.080 (0.761-1.533) 0.667<br>1.156 (0.698-1.915) 0.572                                            |
| <b>(reference:CTLA-4)</b><br>CTLA-4 versus PD-1 (91 vs.544)                                                                                                    | 0.934 (0.593-1.470) 0.768                                                                         |
| n.a., not applicable                                                                                                                                           |                                                                                                   |

**Table S4a: Baseline characteristics and therapy outcome of first-line therapy (BRAF mutant patients; n=788).**

|            | BRAF mutant CTLA-4+PD-1 n=108 (100%) | BRAF mutant PD-1 n=264 (100%) | BRAF mutant BRAF+MEK N=373 (100%) | BRAF mutant CTLA-4 N=43 (100%) |
|------------|--------------------------------------|-------------------------------|-----------------------------------|--------------------------------|
| <b>Age</b> |                                      |                               |                                   |                                |
| ≤65 years  | 84 (77.8)                            | 115 (43.6)                    | 211 (56.6)                        | 26 (60.5)                      |
| >65 years  | 24 (22.2)                            | 149 (56.4)                    | 162 (43.4)                        | 17 (39.5)                      |

|                                               |            |            |            |           |
|-----------------------------------------------|------------|------------|------------|-----------|
| <b>Gender</b>                                 |            |            |            |           |
| Male                                          | 72 (66.7)  | 165 (62.5) | 218 (58.4) | 23 (53.5) |
| Female                                        | 36 (33.3)  | 99 (37.5)  | 155 (41.6) | 20 (46.5) |
| <b>Previous adjuvant therapy in stage III</b> |            |            |            |           |
| None                                          | 104 (96.3) | 253 (95.8) | 355 (95.2) | 40 (93.0) |
| Immune checkpoint inhibitors                  | 1(0.9)     | 1 (0.4)    | 13 (3.5)   | 0 (0.0)   |
| BRAF+MEK inhibitors                           | 1(0.9)     | 1(0.4)     | 1 (0.3)    | 0 (0.0)   |
| Interferon-alpha                              | 2(1.9)     | 8 (3.0)    | 3 (0.8)    | 3 (7.0)   |
| blinded                                       | 0 (0.0)    | 1 (0.4)    | 1 (0.3)    | 0 (0.0)   |
| <b>Previous adjuvant therapy in stage IV</b>  |            |            |            |           |
| None                                          | 101 (93.5) | 250 (94.7) | 342 (91.7) | 37 (86.0) |
| Immune checkpoint inhibitors                  | 2(1.9)     | 1 (0.4)    | 18 (4.8)   | 1 (2.3)   |
| BRAF+MEK inhibitors                           | 4 (3.7)    | 3 (1.1)    | 5 (1.3)    | 1 (2.3)   |
| Interferon-alpha                              | 0 (0.0)    | 6(2.3)     | 7 (1.9)    | 3 (7.0)   |
| Blinded                                       | 1 (0.9)    | 2 (0.8)    | 0 (0.0)    | 1 (2.3)   |
| Chemotherapy                                  | 0 (0.0)    | 2 (0.8)    | 1(0.3)     | 0 (0.0)   |
| <b>ECOG performance status</b>                |            |            |            |           |
| 0                                             | 57 (52.8)  | 123 (46.6) | 149 (39.9) | 15 (34.9) |
| 1                                             | 13 (12.0)  | 35 (13.3)  | 43 (11.5)  | 0 (0.0)   |
| ≥2                                            | 5 (4.6)    | 4 (1.5)    | 22 (5.9)   | 0 (0.0)   |
| unknown                                       | 33 (30.6)  | 102 (38.6) | 159 (42.6) | 28 (65.1) |
| <b>Serum LDH</b>                              |            |            |            |           |
| Normal (≤ULN)                                 | 46 (42.6)  | 143 (54.2) | 136 (36.5) | 27 (62.8) |
| Elevated (>ULN)                               | 62 (57.4)  | 120 (45.5) | 237 (63.5) | 16 (37.2) |
| >2xULN                                        | 32 (29.6)  | 62 (23.5)  | 152 (40.8) | 14 (32.6) |
| unknown                                       | 0 (0.0)    | 1 (0.4)    | 0 (0.0)    | 0 (0.0)   |
| <b>Stage (AJCCv8)</b>                         |            |            |            |           |
| IIIC/D                                        | 8 (7.4)    | 54 (20.5)  | 57 (15.3)  | 6(14.0)   |
| IV M1a                                        | 12 (11.1)  | 36 (13.6)  | 33 (8.8)   | 8(18.6)   |
| IV M1b                                        | 21 (19.4)  | 77 (29.2)  | 63 (16.9)  | 11(25.6)  |
| IV M1c                                        | 65 (60.2)  | 96 (36.4)  | 214 (57.4) | 16 (37.2) |
| Stage IV, not specified                       | 2 (1.9)    | 1 ( 0.4)   | 6(1.6)     | 2 (4.7)   |
| <b>Best overall response</b>                  |            |            |            |           |
| CR                                            | 7 (6.5)    | 52 (19.7)  | 46 (12.3)  | 0 (0.0)   |
| PR                                            | 24 (22.2)  | 34 (12.9)  | 90 (24.1)  | 2(4.7)    |
| SD                                            | 13 (12.0)  | 34 (12.9)  | 47 (12.6)  | 6(14.0)   |
| PD                                            | 30 (27.8)  | 93 (35.2)  | 98 (26.3)  | 27(62.8)  |
| Mixed response                                | 8 (7.4)    | 10 (3.8)   | 12 (3.2)   | 0 (0.0)   |
| Unknown                                       | 26 (24.1)  | 41 (15.5)  | 80 (21.4)  | 8(18.6)   |
| <b>Therapy end reason</b>                     |            |            |            |           |
| Planned stop                                  | 12 (11.1)  | 30 (11.4)  | 16 (4.3)   | 16 (37.2) |
| Toxicity                                      | 29 (26.9)  | 22 (8.3)   | 65 (17.4)  | 6 (14.0)  |
| Disease progression                           | 34 (31.5)  | 128 (48.5) | 171 (45.8) | 16 (37.2) |
| Patient wish                                  | 1 (0.9)    | 16 (6.1)   | 15 (4.0)   | 0 (0.0)   |
| Other                                         | 11 (10.2)  | 26 (9.8)   | 30 (8.0)   | 4 (9.3)   |
| Ongoing                                       | 19 (17.6)  | 37 (14.0)  | 72 (19.3)  | 0 (0.0)   |
| Lost to follow-up                             | 2 (1.8)    | 5 (1.9)    | 4 (1.1)    | 0 (0.0)   |
| <b>Progression</b>                            |            |            |            |           |
| No                                            | 61 (56.5)  | 109 (41.3) | 164 (44.0) | 11 (25.6) |
| Yes                                           | 47 (43.5)  | 155 (58.7) | 209 (56.0) | 32 (74.4) |
| <b>Death</b>                                  |            |            |            |           |
| No                                            | 84 (77.8)  | 169 (64.0) | 196 (52.5) | 14 (32.6) |
| Yes                                           | 24 (22.2)  | 95 (36.0)  | 177 (47.5) | 29 (67.4) |
| <b>Development of brain metastases</b>        |            |            |            |           |
| No                                            | 81 (75.0)  | 219 (83.0) | 250 (67.0) | 22 (51.2) |
| Yes                                           | 27 (25.0)  | 45 (17.0)  | 123 (33.0) | 21 (48.8) |
| <b>Progression-free survival</b>              |            |            |            |           |

|                                                      |                   |                   |                      |                     |
|------------------------------------------------------|-------------------|-------------------|----------------------|---------------------|
| Median in months (95% CI)                            | 8.74 (2.83-14.65) | 5.947 (4.24-7.66) | 9.462 (8.341-10.583) | 2.136 (2.048-2.223) |
| <b>Overall survival</b><br>Median in months (95% CI) | Not reached       | Not reached       | 26.28 (21.1-31.5)    | 34.92 (3.3-41.4)    |

**Table S4b: Frequency of brain metastasis in BRAF mutant patients.**

|                                      | <b>BRAF mutant All<br/>n=788 (100%)</b> | <b>BRAF mutant CTLA-4+PD-1<br/>n=108 (100%)</b> | <b>BRAF mutant PD-1<br/>n=264 (100%)</b> | <b>BRAF mutant BRAF+MEK<br/>N=373 (100%)</b> | <b>BRAF mutant CTLA-4<br/>N=43 (100%)</b> |
|--------------------------------------|-----------------------------------------|-------------------------------------------------|------------------------------------------|----------------------------------------------|-------------------------------------------|
| <b>Frequency of brain metastasis</b> |                                         |                                                 |                                          |                                              |                                           |
| During complete FU time              | 216 (27.4)                              | 27 (25.0)                                       | 45 (17.0)                                | 123 (33.0)                                   | 21 (48.8)                                 |
| Within 12 months after therapy start | 148 (18.8)                              | 19 (17.6)                                       | 30 (11.4)                                | 83 (22.3)                                    | 16 (37.2)                                 |
| Within 24 months after therapy start | 193 (24.5)                              | 24 (22.2)                                       | 37 (14.0)                                | 113 (30.3)                                   | 19 (44.2)                                 |
| Within 36 months after therapy start | 208 (26.4)                              | 27 (25.0)                                       | 41 (15.5)                                | 120 (32.2)                                   | 20 (46.5)                                 |

**Table S5: Univariate Cox regression analysis for progression-free and overall survival in BRAF-mutant patients.**

| <b>Parameters included</b><br>(patient number)                                                                                                                                                                           | <b>Progression-free survival</b><br>Hazard ratio (95% CI) P-value               |                                       | <b>Overall survival</b><br>Hazard ratio (95% CI) P-value                               |                                                  |
|--------------------------------------------------------------------------------------------------------------------------------------------------------------------------------------------------------------------------|---------------------------------------------------------------------------------|---------------------------------------|----------------------------------------------------------------------------------------|--------------------------------------------------|
| <b>Gender (reference: male)</b><br>male versus female (478 vs.310)                                                                                                                                                       | 0.935 (0.772-1.133)                                                             | 0.495                                 | 0.947 (0.757-1.185)                                                                    | 0.634                                            |
| <b>Age (reference: ≤65 years)</b><br>≤65 versus >65 years (436 vs.352)                                                                                                                                                   | 0.926 (0.767-1.118)                                                             | 0.423                                 | 1.184 (0.951-1.472)                                                                    | 0.130                                            |
| <b>BRAF status (reference: wildtype)</b><br>wildtype versus BRAF V600 mutant                                                                                                                                             | n.a.                                                                            |                                       | n.a.                                                                                   |                                                  |
| <b>ECOG performance status (reference: 0)</b><br>0 versus 1 (344 vs. 91)<br>0 versus ≥2 (336 vs. 31)                                                                                                                     | <b>1.359 (1.007-1.833)</b><br>1.499 (0.963-2.333)                               | <b>0.045</b><br>0.073                 | <b>1.739 (1.244-2.432)</b><br><b>2.857 (1.798-4.540)</b>                               | <b>0.001</b><br><b>&lt;0.001</b>                 |
| <b>Serum LDH (reference: normal)</b><br>normal versus elevated (352 vs. 435)                                                                                                                                             | <b>1.309 (1.083-1.581)</b>                                                      | <b>0.005</b>                          | <b>1.451 (1.163-1.810)</b>                                                             | <b>0.001</b>                                     |
| <b>Primary adjuvant drug therapy with immune checkpoint blockade or BRAF+MEK inhibitors (reference: no)</b><br>no versus yes (731 vs. 57)                                                                                | 0.961 (0.655-1.409)                                                             | 0.837                                 | 0.970 (0.617-1.525)                                                                    | 0.895                                            |
| <b>Tumor stage (reference: M1c)</b><br>M1c versus Stage III C/D (391 vs. 125)<br>M1c versus Stage IV M1a (391 vs. 89)<br>M1c versus Stage IV M1b (391 vs. 172)                                                           | <b>0.643 (0.481-0.860)</b><br>0.735 (0.538-1.004)<br><b>0.702 (0.550-0.895)</b> | <b>0.003</b><br>0.053<br><b>0.004</b> | <b>0.579 (0.409-0.830)</b><br><b>0.490 (0.330-0.730)</b><br><b>0.703 (0.532-0.928)</b> | <b>0.003</b><br><b>&lt;0.001</b><br><b>0.013</b> |
| <b>Type of first systemic therapy (reference: BRAF+MEK)</b><br>BRAF+MEK versus CTLA-4+PD-1 (371 vs. 108)<br>BRAF+MEK versus PD-1 (371 vs. 264)<br>BRAF+MEK versus CTLA-4 (371 vs. 43)<br><b>(reference: CTLA-4+PD-1)</b> | 1.148 (0.836-1.600)<br>1.099 (0.891-1.355)<br><b>4.537 (3.087-6.667)</b>        | 0.394<br>0.376<br><b>&lt;0.001</b>    | <b>0.483 (0.315-0.740)</b><br><b>0.653 (0.509-0.838)</b><br>0.893 (0.602-1.325)        | <b>0.001</b><br><b>0.001</b><br>0.574            |

|                                           |                            |                  |                            |              |
|-------------------------------------------|----------------------------|------------------|----------------------------|--------------|
| CTLA-4+PD-1 versus PD-1 (108 vs. 264)     | 0.958 (0.691-1.328)        | 0.795            | 1.352 (0.864-2.116)        | 0.187        |
| CTLA-4+PD-1 versus CTLA-4 (108 vs. 43)    | <b>3.953 (2.499-6.251)</b> | <b>&lt;0.001</b> | <b>1.848 (1.075-3.180)</b> | <b>0.026</b> |
| CTLA-4+PD-1 versus BRAF+MEK (108 vs. 371) | 0.871 (0.634-1.196)        | 0.394            | <b>2.070 (1.351-3.171)</b> | <b>0.001</b> |

n.a., not applicable

**Table S6: Univariate Cox regression analysis for brain metastasis free-survival in BRAF-mutant patients.**

| Parameters included<br>(patient number)                                                                                                                                               | Brain metastasis-free survival<br>Hazard ratio (95% CI) P-value |                  |
|---------------------------------------------------------------------------------------------------------------------------------------------------------------------------------------|-----------------------------------------------------------------|------------------|
| <b>Gender (reference: male)</b><br>male versus female (478 vs.310)                                                                                                                    | 1.038 (0.790-1.363)                                             | 0.789            |
| <b>Age (reference: ≤65 years)</b><br>≤65 versus >65 years (436 vs.352)                                                                                                                | <b>0.669 (0.505-0.885)</b>                                      | <b>0.005</b>     |
| <b>BRAF status (reference: wildtype)</b><br>wildtype versus BRAF V600 mutant                                                                                                          | n.a.                                                            |                  |
| <b>ECOG performance status (reference: 0)</b><br>0 versus 1 (344 vs. 91)<br>0 versus ≥2 (336 vs. 31)                                                                                  | 1.222 (0.792-1.887)                                             | 0.365            |
|                                                                                                                                                                                       | 1.645 (0.855-3.163)                                             | 0.136            |
| <b>Serum LDH (reference: normal)</b><br>normal versus elevated (352 vs. 435)                                                                                                          | 1.234 (0.942-1.616)                                             | 0.127            |
| <b>Primary adjuvant drug therapy with immune checkpoint blockade or BRAF+MEK/BRAF+MEK inhibitors (reference: no)</b><br>no versus yes (731 vs. 57)                                    | 1.088 (0.654-1.810)                                             | 0.746            |
| <b>Tumor stage (reference: M1c)</b><br>M1c versus Stage III C/D (391 vs. 125)<br>M1c versus Stage IV M1a (391 vs. 89)<br>M1c versus Stage IV M1b (391 vs. 172)                        | <b>0.421 (0.260-0.682)</b>                                      | <b>&lt;0.001</b> |
|                                                                                                                                                                                       | <b>0.369 (0.212-0.641)</b>                                      | <b>&lt;0.001</b> |
|                                                                                                                                                                                       | 0.864 (0.630-1.186)                                             | 0.475            |
| <b>Type of first systemic therapy (reference: BRAF+MEK)</b><br>BRAF+MEK versus CTLA-4+PD-1 (373 vs. 108)<br>BRAF+MEK versus PD-1 (373 vs. 264)<br>BRAF+MEK versus CTLA-4 (373 vs. 43) | 0.786 (0.518-1.193)                                             | 0.259            |
|                                                                                                                                                                                       | <b>0.441 (0.313-0.622)</b>                                      | <b>&lt;0.001</b> |
|                                                                                                                                                                                       | 1.193 (0.751-1.896)                                             | 0.466            |
| <b>(reference:CTLA-4+PD-1)</b><br>CTLA-4+PD-1 versus PD-1 (108 vs. 264)<br>CTLA-4+PD-1 versus CTLA-4 (108 vs. 43)<br>CTLA-4+PD-1 versus BRAF+MEK (108 vs. 371)                        | <b>0.561 (0.348-0.905)</b>                                      | <b>0.018</b>     |
|                                                                                                                                                                                       | 1.517 (0.857-2.684)                                             | 0.152            |
|                                                                                                                                                                                       | 1.271 (0.838-1.929)                                             | 0.259            |

n.a., not applicable

**Table S7: Baseline and therapy characteristics of patients with and without second-line therapy**

|               | Patients without<br>second-line therapy<br>N=774 (100%) | Patients with<br>second-line therapy<br>N=930 (100%) |
|---------------|---------------------------------------------------------|------------------------------------------------------|
| <b>Age</b>    |                                                         |                                                      |
| ≤65 years     | 295 (38.1)                                              | 485 (52.2)                                           |
| >65 years     | 479 (61.9)                                              | 445 (47.8)                                           |
| <b>Gender</b> |                                                         |                                                      |
| male          | 486 (62.8)                                              | 569 (61.2)                                           |
| female        | 288 (37.2)                                              | 361 (38.8)                                           |

|                                               |            |            |
|-----------------------------------------------|------------|------------|
| <b>ECOG performance status</b>                |            |            |
| 0                                             | 370 (47.8) | 420 (45.2) |
| 1                                             | 95 (12.3)  | 120 (12.9) |
| ≥2                                            | 36 (4.7)   | 26 (2.8)   |
| unknown                                       | 273 (35.3) | 364 (39.1) |
| <b>Serum LDH</b>                              |            |            |
| Normal (≤ULN)                                 | 364 (47.0) | 447 (48.1) |
| Elevated (>ULN)                               | 410 (53.0) | 480 (51.6) |
| >2xULN                                        | 241 (31.1) | 251 (27.0) |
| unknown                                       | 0 (0.0)    | 3 (0.3)    |
| <b>AJCC Stage at first-line therapy start</b> |            |            |
| III C/D                                       | 140 (18.1) | 134 (14.4) |
| IV M1a                                        | 76 (9.8)   | 97 (10.4)  |
| IV M1b                                        | 196 (25.3) | 215 (23.1) |
| IV M1c                                        | 344 (44.4) | 477 (51.3) |
| IV not specified                              | 18 (2.3)   | 7 (0.8)    |
| <b>BRAF status</b>                            |            |            |
| V600 wildtype                                 | 463 (59.8) | 453 (48.7) |
| V600 mutant                                   | 311 (40.2) | 477 (51.3) |
| <b>Best response to first-line therapy</b>    |            |            |
| CR                                            | 161 (20.8) | 50 (5.4)   |
| PR                                            | 146 (18.9) | 148 (15.9) |
| SD                                            | 97 (12.5)  | 118 (12.7) |
| PD                                            | 137 (17.7) | 465 (50.0) |
| MR                                            | 27 (3.5)   | 38 (4.1)   |
| unknown                                       | 206 (26.6) | 111 (11.9) |
| <b>First-line therapy end reason</b>          |            |            |
| Disease progression                           | 133 (17.2) | 574 (61.7) |
| Toxicity                                      | 125 (16.1) | 175 (18.8) |
| Ongoing                                       | 245 (31.7) | 0 (0.0)    |
| Planned stop                                  | 94 (12.1)  | 88 (9.5)   |
| Lost to follow-up                             | 26 (3.4)   | 0 (0.0)    |
| Patient wish                                  | 58 (7.5)   | 17 (1.8)   |
| Other                                         | 93 (12.0)  | 76 (8.1)   |
| <b>Progression</b>                            |            |            |
| No                                            | 498 (64.3) | 234 (25.2) |
| Yes                                           | 276 (35.7) | 696 (74.8) |
| <b>Death</b>                                  |            |            |
| No                                            | 577 (74.5) | 426 (45.8) |
| Yes                                           | 197 (25.5) | 504 (54.2) |
| <b>Brain metastasis</b>                       |            |            |
| No                                            | 706 (91.2) | 611 (65.7) |
| Yes                                           | 68 (8.8)   | 319 (34.3) |
| <b>First-line therapy</b>                     |            |            |
| CTLA-4+PD-1                                   | 211 (27.3) | 178 (19.1) |
| PD-1                                          | 403 (52.1) | 405 (43.5) |
| CTLA-4                                        | 15 (1.9)   | 119 (12.8) |
| BRAF+MEK                                      | 145 (18.7) | 228 (24.5) |

Table S8: Therapy sequence in patients with second-line therapy

|     | All patients<br>N=930 (100%) | BRAF mutant<br>N=477 (100%) | BRAF wildtype<br>N=453 (100%) |
|-----|------------------------------|-----------------------------|-------------------------------|
| Age |                              |                             |                               |

|                                               |            |            |            |
|-----------------------------------------------|------------|------------|------------|
| ≤65 years                                     | 485 (52.2) | 282 (59.1) | 203 (44.8) |
| >65 years                                     | 445 (47.8) | 195 (40.9) | 250 (55.2) |
| <b>Gender</b>                                 |            |            |            |
| male                                          | 569 (61.2) | 286 (60.0) | 283 (62.5) |
| female                                        | 361 (38.8) | 191 (40.0) | 170 (37.5) |
| <b>ECOG performance status</b>                |            |            |            |
| 0                                             | 420 (45.2) | 207 (43.4) | 213 (47.0) |
| 1                                             | 120 (12.9) | 59 (12.4)  | 61 (13.5)  |
| ≥2                                            | 26 (2.8)   | 19 (4.0)   | 7 (1.5)    |
| unknown                                       | 364 (39.1) | 192 (40.3) | 172 (38.0) |
| <b>Serum LDH</b>                              |            |            |            |
| Normal (≤ULN)                                 | 447 (48.1) | 209 (43.8) | 238 (52.5) |
| Elevated (>ULN)                               | 480 (51.6) | 267 (56.0) | 213 (47.0) |
| >2xULN                                        | 251 (27.0) | 155 (32.5) | 96 (21.2)  |
| unknown                                       | 3 (0.3)    | 1 (0.2)    | 2 (0.4)    |
| <b>AJCC Stage at first-line therapy start</b> |            |            |            |
| III C/D                                       | 134 (14.4) | 64 (13.4)  | 70 (15.5)  |
| IV M1a                                        | 97 (10.4)  | 55 (11.5)  | 42 (9.3)   |
| IV M1b                                        | 215 (23.1) | 99 (20.8)  | 116 (25.6) |
| IV M1c                                        | 477 (51.3) | 255 (53.5) | 222 (49.0) |
| IV not specified                              | 7 (0.8)    | 4 (0.8)    | 3 (0.7)    |
| <b>BRAF status</b>                            |            |            |            |
| V600 wildtype                                 | 472 (50.8) | n.a.       | n.a.       |
| V600 mutant                                   | 458 (49.2) |            |            |
| <b>Therapy sequence</b>                       |            |            |            |
| CTLA-4+PD-1_BRAF+MEK                          | 42 (4.5)   | 42 (8.8)   |            |
| PD-1_BRAF+MEK                                 | 91 (9.8)   | 91 (19.1)  |            |
| BRAF+MEK_CTLA-4+PD-1                          | 73 (7.8)   | 73 (15.3)  |            |
| BRAF+MEK_PD-1                                 | 79 (8.5)   | 79 (16.6)  |            |
| CTLA-4+PD-1_PD-1                              | 74 (8.0)   | 13 (2.7)   | 61 (13.5)  |
| PD-1_CTLA-4+PD-1                              | 55 (5.9)   | 11 (2.3)   | 44 (9.7)   |
| PD-1_CTLA-4                                   | 54 (5.8)   | 2 (0.4)    | 52 (11.5)  |
| others                                        | 462 (50.3) | 166 (34.8) | 296 (65.3) |

n.a., not applicable

**Table S9: Multivariate Cox regression analysis for brain metastasis-free and overall survival in BRAF-wildtype patients including therapy sequence.**

| Parameters included<br>(patient number)                                      | Overall survival<br>N= 100<br>Hazard ratio (95% CI) P-value | Brain metastasis-free survival<br>N=100<br>Hazard ratio (95% CI) P-value |
|------------------------------------------------------------------------------|-------------------------------------------------------------|--------------------------------------------------------------------------|
| <b>Gender (reference: male)</b><br>male versus female                        | 1.030 (0.527-2.012) 0.932                                   | 0.696 (0.270-1.791) 0.452                                                |
| <b>Age (reference: ≤65 years)</b><br>≤65 versus >65 years                    | 0.402 (0.160-1.009) 0.052                                   | 0.743 (0.230-2.401) 0.619                                                |
| <b>BRAF status (reference: wildtype)</b><br>wildtype versus BRAF V600 mutant | n.a.                                                        | n.a.                                                                     |
| <b>ECOG performance status (reference :0)</b><br>0 versus 1<br>0 versus ≥2   | <b>2.104 (1.002-4.418) 0.049</b><br>n.a.                    | 1.113 (0.344-3.605) 0.858<br>n.a.                                        |
| <b>Serum LDH (reference: normal)</b><br>normal versus elevated               | 1.405 (0.704-2.805) 0.335                                   | 0.570 (0.236-1.379) 0.213                                                |
| Primary adjuvant drug therapy with immune checkpoint blockade or             |                                                             |                                                                          |



|                                                                                                                                                          |                                                                                     |                                                                |
|----------------------------------------------------------------------------------------------------------------------------------------------------------|-------------------------------------------------------------------------------------|----------------------------------------------------------------|
| BRAF+MEK inhibitors<br>(reference: no)<br>Yes                                                                                                            | n.a.                                                                                | 3.256 (0.319-33.260) 0.319                                     |
| <b>Tumor stage (reference: M1c)</b><br>M1c vs. Stage III C/D<br>M1c vs. Stage IV M1a<br>M1c vs. Stage IV M1b                                             | 1.509 (0.569-4.004) 0.408<br>0.446 (0.122-1.634) 0.223<br>0.689 (0.300-1.582) 0.380 | 0.234 (0.046-1.191) 0.080<br>n.a.<br>0.364 (0.118-1.110) 0.078 |
| <b>Therapy sequence<br/>(reference: PD-1_CTLA-4+PD-1)</b><br><br><i>PD-1_CTLA-4+PD-1 vs. CTLA-4+PD-1_PD-1</i><br><i>PD-1_CTLA-4+PD-1 vs. PD-1_CTLA-4</i> | 2.330 (0.700-7.751) 0.168<br><b>9.870 (3.494-27.879) 0.001</b>                      | 0.401 (0.103-1.561) 0.188<br>2.401 (0.846-6.815) 0.100         |

n.a., not applicable

**Table S10: Multivariate Cox regression analysis for brain metastasis-free and overall survival in BRAF-mutant patients including therapy sequence.**

| Parameters included<br>(patient number)                                                                                                                                                                                                                                     | Overall survival<br>N= 205<br>Hazard ratio (95% CI) P-value                                               | Brain metastasis free-survival<br>N=205<br>Hazard ratio (95% CI) P-value                                         |
|-----------------------------------------------------------------------------------------------------------------------------------------------------------------------------------------------------------------------------------------------------------------------------|-----------------------------------------------------------------------------------------------------------|------------------------------------------------------------------------------------------------------------------|
| <b>Gender (reference: male)</b><br>male versus female                                                                                                                                                                                                                       | 1.242 (0.832-1.854) 0.290                                                                                 | 1.282 (0.815-2.017) 0.283                                                                                        |
| <b>Age (reference: ≤65 years)</b><br>≤65 versus >65 years                                                                                                                                                                                                                   | 1.242 (0.832-1.854) 0.290                                                                                 | 0.751 (0.456-1.238) 0.262                                                                                        |
| <b>BRAF status (reference: wildtype)</b><br>wildtype versus BRAF V600 mutated                                                                                                                                                                                               | n.a.                                                                                                      | n.a.                                                                                                             |
| <b>ECOG performance status<br/>(reference :0)</b><br>0 versus 1<br>0 versus ≥2                                                                                                                                                                                              | <b>1.745 (1.090-2.795) 0.021</b><br><b>3.146 (1.656-5.975) &lt;0.001</b>                                  | 1.417 (0.809-2.481) 0.223<br>1.264 (0.521-3.067) 0.605                                                           |
| <b>Serum LDH (reference: normal)</b><br>normal versus elevated                                                                                                                                                                                                              | 1.191 (0.804-1.764) 0.383                                                                                 | 1.299 (0.814-2.071) 0.273                                                                                        |
| Primary adjuvant drug therapy with<br>immune checkpoint blockade or<br>BRAF+MEK inhibitors<br>(reference: no)<br>Yes                                                                                                                                                        | 0.898 (0.343-2.348) 0.826                                                                                 | 0.888 (0.329-2.398) 0.815                                                                                        |
| <b>Tumor stage (reference: M1c)</b><br>M1c vs. Stage III C/D<br>M1c vs. Stage IV M1a<br>M1c vs. Stage IV M1b                                                                                                                                                                | 0.533 (0.223-1.273) 0.157<br>0.511 (0.240-1.091) 0.083<br>1.260 (0.809-1.961) 0.307                       | 0.747 (0.299-1.864) 0.532<br>0.655 (0.270-1.585) 0.348<br>1.323 (0.786-2.224) 0.292                              |
| <b>Therapy sequence<br/>(reference:CTLA-4+PD-1_BRAF+MEK)</b><br><br><i>CTLA-4+PD-1_BRAF+MEK vs. PD-1_BRAF+MEK</i><br><i>CTLA-4+PD-1_BRAF+MEK vs. BRAF+MEK_CTLA-4+PD-1</i><br><i>CTLA-4+PD-1_BRAF+MEK vs. BRAF+MEK_PD-1</i><br><i>CTLA-4+PD-1_BRAF+MEK vs. PD-1_BRAF+MEK</i> | 1.547 (0.797-3.004) 0.197<br><b>1.988 (1.026-3.852) 0.042</b><br>1.863 (0.955-3.633) 0.068<br><b>None</b> | 0.750 (0.371-1.517) 0.423<br>1.421 (0.728-2.776) 0.303<br>1.095 (0.540-2.219) 0.801<br>0.179 (0.023-1.391) 0.100 |

|                                           |                                    |                                  |
|-------------------------------------------|------------------------------------|----------------------------------|
| CTLA-4+PD-1_BRAF+MEK vs. PD-1_CTLA-4+PD-1 | 0.272 (0.035-2.140) 0.216          | 0.213 (0.027-1.683) 0.142        |
| CTLA-4+PD-1_BRAF+MEK vs. PD-1_CTLA-4      | <b>10.391 (1.245-86.740) 0.031</b> | None                             |
| <b>(reference: PD-1_BRAF+MEK)</b>         |                                    |                                  |
| PD-1_BRAF+MEK vs. CTLA-4+ PD-1_BRAF+MEK   | 0.646 (0.333-1.255) 0.197          | 1.334 (0.659-2.699) 0.423        |
| PD-1_BRAF+MEK vs. BRAF+MEK_CTLA-4+PD-1    | 1.285 (0.760-2.172) 0.349          | <b>1.896 (1.013-3.548) 0.045</b> |
| PD-1_BRAF+MEK vs. BRAF+MEK_PD-1           | 1.204 (0.732-1.981) 0.465          | 1.460 (0.786-2.714) 0.231        |
| PD-1_BRAF+MEK vs. CTLA-4+PD-1_PD-1        | n.a.                               | 0.238 (0.031-1.812) 0.166        |
| PD-1_BRAF+MEK vs. PD-1_CTLA-4+PD-1        | 0.176 (0.024-1.314) 0.090          | 0.238 (0.037-2.172) 0.225        |
| PD-1_BRAF+MEK vs. PD-1_CTLA-4             | 6.716 (0.836-53.924) 0.073         | n.a.                             |

**Table S11a: Incidence of Brain metastasis in BRAF mutant patients with BRAF+MEK targeted therapy.**

|                         | dabrafenib+trametinib | vemurafenib+cobimetinib | encorafenib+binimetinib |
|-------------------------|-----------------------|-------------------------|-------------------------|
| <b>Brain metastasis</b> |                       |                         |                         |
| No                      | 170 (66.1%)           | 40 (64.5%)              | 40 (74.1%)              |
| Yes                     | 87 (33.9%)            | 22 (35.5%)              | 14 (25.9%)              |

**Table S11b: Multivariate Cox regression analysis for brain metastasis-free and overall survival in BRAF-mutant patients with BRAF+MEK inhibitor therapy.**

| Parameters included<br>(patient number)                                                                                         | Overall survival<br>N= 373 |              | Brain metastasis-free survival<br>N=373 |         |
|---------------------------------------------------------------------------------------------------------------------------------|----------------------------|--------------|-----------------------------------------|---------|
|                                                                                                                                 | Hazard ratio (95% CI)      | P-value      | Hazard ratio (95% CI)                   | P-value |
| <b>Gender (reference: male)</b><br>male versus female (125 vs.89)                                                               | 0.797 (0.510-1.244)        | 0.318        | 1.124 (0.685-1.847)                     | 0.643   |
| <b>Age (reference: ≤65 years)</b><br>≤65 versus >65 years (123 vs.91)                                                           | 1.235 (0.814-1.872)        | 0.321        | 0.795 (0.481-1.312)                     | 0.369   |
| <b>BRAF status (reference: wildtype)</b><br>wildtype versus BRAF V600 mutant                                                    | n.a.                       |              | n.a.                                    |         |
| <b>ECOG performance status (reference :0)</b><br>0 versus 1 (149 vs.43)<br>0 versus ≥2 (149 vs.22)                              | <b>1.944 (1.167-3.236)</b> | <b>0.011</b> | 1.503 (0.804-2.810)                     | 0.202   |
|                                                                                                                                 | <b>2.060 (1.132-3.750)</b> | <b>0.018</b> | 1.142 (0.509-2.565)                     | 0.747   |
| <b>Serum LDH (reference: normal)</b><br>normal versus elevated (87 vs. 127)                                                     | 0.770 (0.440-1.348)        | 0.360        | 1.037 (0.641-1.676)                     | 0.884   |
| <b>Primary adjuvant drug therapy with immune checkpoint blockade or BRAF+MEK inhibitors (reference: no)</b><br>Yes (186 vs. 28) | 0.973 (0.471-2.012)        | 0.942        | 0.626 (0.277-1.415)                     | 0.260   |

|                                                                      |                     |       |                            |              |
|----------------------------------------------------------------------|---------------------|-------|----------------------------|--------------|
| <b>Tumor stage (reference: M1c)</b>                                  |                     |       |                            |              |
| M1c vs. Stage III C/D (126 vs. 25)                                   | 0.519 (0.217-1.240) | 0.140 | 0.772 (0.333-1.788)        | 0.545        |
| M1c vs. Stage IV M1a (126 vs. 20)                                    | 0.424 (0.178-1.008) | 0.052 | <b>0.323 (0.113-0.926)</b> | <b>0.035</b> |
| M1c vs. Stage IV M1b (126 vs. 43)                                    | 0.830 (0.487-1.416) | 0.494 | 0.664 (0.350-1.261)        | 0.211        |
| <b>BRAF+MEK inhibitor regimen (reference: dabrafenib+trametinib)</b> |                     |       |                            |              |
| dabrafenib+trametinib vs. vemurafenib+cobmetinib (139 vs. 34)        | 0.770 (0.440-1.348) | 0.360 | 0.942 (0.501-1.770)        | 0.852        |
| dabrafenib+trametinib vs. encorafenib+binimetinib (139 vs. 41)       | 1.296 (0.676-2.485) | 0.436 | 1.648 (0.835-3.251)        | 0.150        |

n.a., not applicable

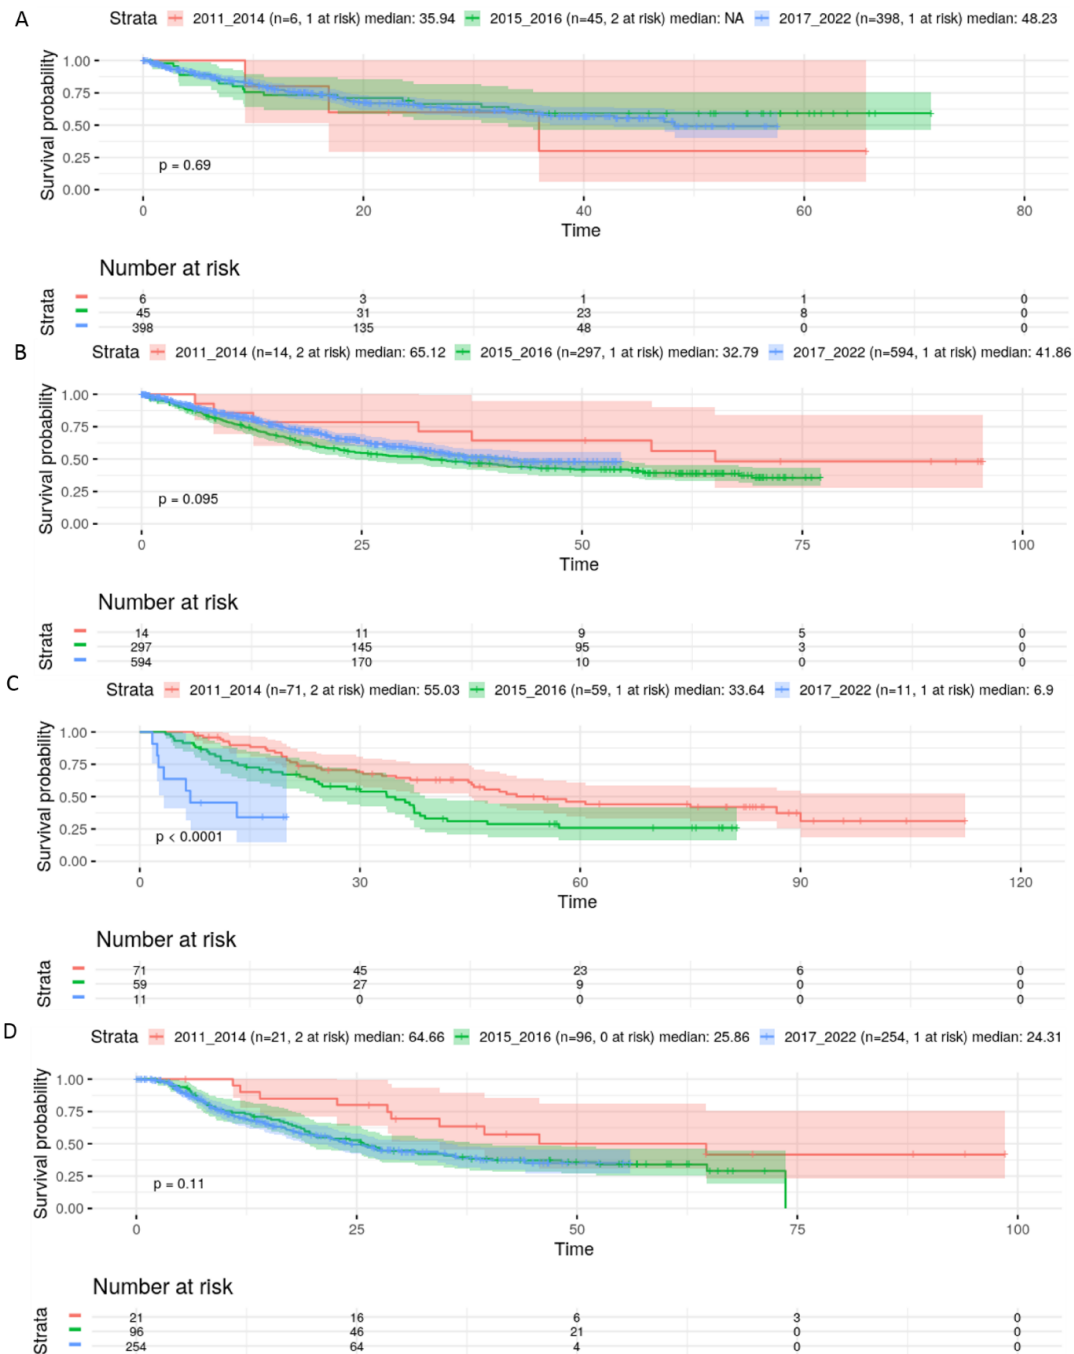

**Figure S1. Kaplan-Meier curves showing overall survival for first-line systemic therapy in all patients by year of first-line therapy start. A CTLA-4+PD-1, B PD-1, C CTLA-4 and D BRAF+MEK. The log-rank test was used to compare between groups;  $p < 0.05$  was considered significant.**
